# Supplementary material for: The Diagnostic and Prognostic Potential of the B-Cell Repertoire in Membranous Nephropathy
Source: Front Immunol. 2021 May 27;12:635326. doi: 10.3389/fimmu.2021.635326 (PMC8190383; doi:10.3389/fimmu.2021.635326)
Supplement: Supplementary file 1 [file Table_1.xlsx]

## Sheet: S1
Table S1：Clinical characteristics of 66 MN patients
sample	gender	age	24-hours proteinuria(g)	serum albumin(g/L)	PLA2R（Ru/ml）	Urine protein at 6 months after treatment	stage	urine occult blood	uric acid	creatinine	cholesterol	IgGU	kapu	ALb	κ/λ	lamu	IgG	IgA	IgM	C3	C4	IgG	IgA	IgM	C3	C1q	Fib
213	male	59	3.85	26.2	/	negative	2	2	576	101	8.79	47.5	16.5	865	1.82	10.4	5.1	3.7	0.95	1.27	0.26	4	0	0	0	0	1
290	female	48	10.05	25.2	/	negative	2	0.1	277	49	9.49	282	74.9	3010	1.38	54.4	6.7	2.35	1.34	1.4	0.32	4	0	0	1	1	0
302	male	48	15.9	23.5	6.11	negative	2	2	456	79	7.39	116	48	3840	1.5	32	3.5	1.64	1.45	1.25	0.24	4	0	1	0	0	0
384	female	49	2	22.5	443.21	positive	2	2	271	66	4.52	114	32.7	1230	1.57	20.8	13.8	3.06	1.77	1.12	0.31	4	0	0	3	0	0
470	male	56	2.05	25.8	/	negative	2	3	379	76	6.28	73.9	39.9	970	1.43	27.9	10.1	4.9	0.65	1.55	0.24	4	0	0	2	0	0
471	male	41	7.5	15.7	85.08	negative	2	2	419	87	9.58	289	92.2	3810	1.73	53.2	3.7	1.44	1.91	1.13	0.23	4	0	0	0	2	0
497	male	47	8.49	26.9	8.48	positive	2	2	447	63	10.3	580	202	11300	1.423	142	4.5	3.68	1.17	1.43	0.49	4	0	0	2	1	0
502	male	65	4.94	24.5	88.03	positive	2	2	542	67	10.3	193	34.8	2210	0.991	35.1	8.4	3.52	0.89	1.24	0.35	4	0	0	1	0	0
503	male	51	1.71	30.6	1.19	positive	1	1	429	103	7.66	186	103	1920	1.918	53.7	12.6	5.17	1.03	1.61	0.43	3	0	0	0	0	0
504	female	54	2.44	35.3	62.28	negative	2	0	483	78	6.61	24.6	9.4	274	2.037	4.6	12.5	1.95	0.84	1.19	0.28	0	0	0	0	0	0
505	male	16	5.1	20.1	164.48	negative	2	2	393	71	15.47	945	281	10200	1.176	239	5.1	4.13	5.63	2.81	0.45	4	0	0	2	1	0
506	male	48	4.19	29.2	36.69	positive	2	2	582	78	5.97	58.6	20.4	1610	1.511	13.5	7.7	3.17	1.82	1.44	0.44	4	0	0	1	1	0
512	male	46	1.83	27.4	677.45	positive	2	2	412	72	10.54	350	130	7910	1.505	86.4	6.1	2.39	1.15	1.21	0.41	4	0	0	1	0	2
543	female	62	2.8	24.9	7.12	negative	2	0.1	237	66	9.74	45	15.8	1440	2.232	7.1	4.1	1.27	0.79	1.35	0.32	4	0	0	1	1	0
546	male	52	4.52	20.7	118.45	positive	2	2	404	89	12.2	83	26.4	1840	1.517	17.4	/	/	/	/	/	4	2	1	1	2	0
547	female	45	2.46	29.2	90.29	negative	2	3	424	53	4.84	218	61.5	1640	1.178	52.2	10	1.38	1.35	0.9	0.24	3	0	1	1	2	2
551	male	46	4.18	25.7	483.82	positive	2	1	452	94	6.87	86.7	35.6	1230	2.49	14.3	4.8	2.82	1.49	1.44	0.41	3	0	0	2	0	0
558	male	59	5.98	22.8	213.47	positive	1 and with segmental sclerosis	2	589	107	8.82	340	90.6	7530	1.142	79.3	3.8	2.32	1.09	1.17	0.44	1.5	0	0	0	2	0
567	female	59	0.32	36.9	0.6	positive	1	2	309	54	7.54	73.1	35.4	1520	1.654	21.4	16.2	4.12	1.15	1.32	0.33	3	0	0.5	0	1	0
579	male	56	9.62	18.9	308.74	No inspection	Hepatitis B associated membranous nephropathy	2	442	116	11.57	144	78.1	3370	2.083	37.5	3.7	1.39	2.59	1.33	0.2	4	0	1	2	0	2
581	female	65	1.16	36.1	2.97	negative	2	3	362	61	5.53	23	8.8	324	1.804	4.9	10.7	3.91	0.36	1.03	0.25	4	0	1	0	1	0
584	female	61	0.94	27	0.6	negative	2	0.1	181	66	12.31	11	23.3	310	1.779	13.1	8.7	1.75	0.4	1.3	0.41	4	0	0	0	0	0
588	female	46	2.61	30.2	/	positive	2	2	287	41	3.22	411	121	8340	1.315	92	/	/	/	/	/	3	0	0	1	1	0
594	male	51	8.14	19.7	16.36	positive	Hepatitis B associated membranous nephropathy	2	465	74	7.5	734	116	4400	0.585	195	6.5	4.67	1.89	1.51	0.35	4	2	0	2	0	0
601	male	47	7.78	23.1	49.13	negative	2	2	398	91	7.66	98.8	33.4	1760	1.152	29	4.2	3.28	1.16	1.28	0.39	4	0.5	1	1	0.5	0
613	male	41	2.77	33.7	7.1	negative	2	1	463	66	6.22	71.9	29.2	3720	1.364	21.4	5.5	2.06	1.21	1.08	0.21	4	0	0.5	1	1	0.5
614	male	59	2.41	23.6	0.6	positive	2.5	2	472	69	8.25	175	34.8	407	0.991	35.1	24.1	4.45	0.95	1.41	0.37	1	0.5	1	0.5	1	0
620	female	62	1.22	30.6	0.6	positive	2	2	404	62	8.96	67.7	28.1	1770	1.503	18.7	9.1	2.81	0.89	1.8	0.45	4	0	0	2	2	0
621	male	51	2.91	28.7	191.1	positive	2	1	312	165	7.3	103	30.9	925	1.14	27.1	5.8	2.61	1.76	2	0.53	4	0	0	2	0	0
623	male	42	5	21.1	76.39	positive	2	2	497	88	15.6	478	161	7740	1.594	101	4	2.4	1.34	1.37	0.43	3	0	1	2	1	0
628	male	53	5.44	29.8	348.27	positive	2 and with segmental sclerosis	0.1	361	91	10.64	188	57.4	1540	2.786	20.6	11.9	3.14	2.64	1.94	0.34	4	0	0	0	1	0
630	female	44	2.7	22.2	1500	positive	2	1	438	72	4.97	208	82	2260	1.598	51.3	8.6	2.4	1.14	1.13	0.22	4	0	0	1	1	0
633	female	61	4.5	31.4	206.84	positive	2	1	414	107	7.87	113	54.6	1650	1.625	33.6	5.7	3.21	0.98	1.58	0.25	4	0	2	1	0	0
634	male	32	8.34	32.4	13.75	negative	2	2	339	77	9.17	81.3	40.7	2130	2.592	15.7	6.8	2.45	1.11	1.3	0.34	4	0	0	0	0	0
638	male	66	8.06	20.5	161.45	negative	2	2	419	118	9.03	465	119	3590	1.285	92.6	4.4	1.62	1.36	1.33	0.36	4	0	0	1	0	0
639	male	28	1.25	42.1	0.91	positive	2	2	361	63	5.36	113	50.2	1710	1.702	29.5	11.9	4.24	2.12	1.39	0.42	4	0	0	0	0	0
641	female	69	6.14	24.6	596.41	positive	2	2	426	106	7.22	139	43.3	952	1.304	33.2	9.7	3.26	2.45	1.54	0.38	4	0	0	1	1	0
642	male	54	4.51	21.2	293.39	positive	1.5	2	493	100	8.19	185	58.1	2480	1.729	33.6	5.6	2.41	1.24	1.41	0.26	4	0	0	2	0.5	0
654	male	49	6.57	24.7	63.04	positive	2.5	2	320	93	8.99	1410	389	11400	1.607	242	7.3	4.14	0.97	1.36	0.24	4	0	1	0.5	1	0.5
661	male	51	6.04	29.9	41.89	positive	2	2	598	90	5.69	131	59.5	3120	1.558	38.2	6.3	3.24	0.49	1.6	0.41	3	0	0	0.5	0.5	0
663	female	47	0.66	25.4	28.48	negative	Without glomerular	2	345	66	8.37	356	135	2180	2	67.5	7	2.85	1.33	1.47	0.67
674	male	35	7.98	17.9	29.73	negative	2	2	257	79	9.54	1290	415	15200	1.66	250	3.1	1.68	1.5	1.12	0.22	4	0	1	1	1	0
676	male	65	4.62	28.1	615.19	positive	2	2	273	91	4.95	220	61.3	1800	1.163	52.7	11.1	4.49	1.92	1.74	0.44	4	0	1	0	0	0
677	female	25	2.22	26.7	100.2	negative	2	2	425	40	10.24	19.1	8.1	482	1.45	5.6	6	2.72	1.46	1.21	0.36	3	0	2	2	1	0
681	male	55	1.11	31.3	63.88	positive	2	0	848	67	6.11	/	/	/	/	/	/	/	/	/	/	3	0	1	0	2	0
683	female	52	0.33	31.4	/	positive	2	2	205	38	6.03	22.8	9.2	183	1.574	5.8	/	/	/	/	/	4	0	0	1	1	0
694	male	56	5.14	21.6	/	negative	2 and Hepatitis B associated membranous nephropathy	2	354	102	7.21	190	75.2	2560	1.586	47.4	/	/	/	/	/	4	0	0	2	0	0
696	male	50	4.33	24.9	9.24	negative	2	0	412	78	6.34	172	74.7	2990	1.442	51.8	4.6	1.88	0.66	1.12	0.33	4	0	0	0	0	0
697	male	42	4.74	31.6	117.72	positive	2	1	649	163	5.6	199	64.8	4400	1.55	41.8	4.9	2.1	0.83	1.38	0.44	4	0	0	0	0	0
702	male	28	2.35	28.7	/	positive	2	2	317	72	5.86	14.8	7.8	139	2.053	<3.78	6.9	1.58	0.88	0.98	0.25	4	0	0	0	1	0
703	male	53	6.34	32.8	85.78	positive	2.5	2	488	72	6.79	97.1	54.4	2740	2.007	27.1						4	0.5	0.5	0.5	2.5	0
709	male	61	11.11	23	18.91	positive	Atypical membranous nephropathy	2	555	97	5.73	421	147	4610	1.482	99.2	/	/	/	/	/	4	1	1	2	2	0
711	male	46	7.69	25.3	1500	positive	2	1	509	113	7.91	723	170	10500	1.574	108	4.3	1.78	1.66	1.5	0.14	3	0	0.5	2	1.5	0
713	female	55	7.57	24.7	610.01	positive	2.5	1	341	57	7.21	446	109	5380	1.459	74.7	7.9	1.32	1.12	1.13	0.2	4	0	0.5	0.5	1	0
715	male	65	1.3	35.5	/	positive	2	2	772	115	7.71	105	48.5	4040	1.644	29.5	8.2	2.86	1.19	1.93	0.51	4	1	2	0.5	1	0
717	female	56	2.77	30.4	/	positive	1.5	2	318	52	5.35	44.2	20	403	2.058	9.7	8.8	3.23	0.99	1.22	0.27	3	0	0.5	1	1	0
721	female	39	4.12	31.4	/	positive	2	2	451	47	7.13	37.2	11	399	1.792	6.1	8.4	2.33	1.87	1.27	0.21	4	0	1	1	1	0
722	female	33	3.61	36	/	negative	2	0.1	279	69	6.32	56.1	21.5	902	1.443	14.9	7.5	2	0.97	1.26	0.2	4	0	0	0	1	0
732	female	47	2.79	25.6	/	positive	2	1	401	57	5.28	689	149	5300	1.583	94.1	6.9	1.49	1.77	1.12	0.26	/	/	/	/	/	/
734	male	62	1.71	40.4	/	positive	2 and with segmental sclerosis	1	489	78	6.04	172	58.3	1730	1.881	31						0	0	0	0	0	0
737	female	46	3.56	32.2	/	positive	2	1	227	54	7.8	23.8	10.6	118	2.398	4.4	/	/	/	/	/	3	0	1	0	0	0
738	male	48	1.37	26.8	/	positive	2	2	417	86	6.68	142	47	1180	2.655	17.7	/	/	/	/	/	4	0	0	0	1	0
741	female	33	0.86	42	/	negative	2	1	382	54	5.91	66.2	43.4	187	3.056	14.2	14.7	1.8	1.37	1.04	0.21	2.5	0	1.5	0.5	0.5	0
744	male	61	3.23	31.4	/	positive	1.5	2	538	104	8.26	64.4	20.8	1570	1.809	11.5	11.3	1.13	0.48	1.13	0.32	3	0	0.5	2	1	0
748	female	26	7.4	27.1	/	positive	Atypical membranous nephropathy	1	382	49	6.8	619	145	5940	1.422	102	7.5	2.07	1.46	0.89	0.27	3	0.5	2	3	2	0
750	male	58	4.81	24.4	/	positive	2.5	2	395	87	6.62	59.6	14.1	717	1.44	9.8	4.4	0.91	0.75	0.79	0.12	4	2	3	2	3	0

## Sheet: S2
Table S2：Profiling of the IGH Sequencing Data
status	sample_ID	sequences	clonotype	Shannon	simpson	CDR3_len	hydrophobicity	SHM/1000nt	Germline index	IGHV1-12	IGHV1-14	IGHV1-17	IGHV1-18	IGHV1-2	IGHV1-24	IGHV1-3	IGHV1-45	IGHV1-46	IGHV1-58	IGHV1-67	IGHV1-68	IGHV1-69	IGHV1-69-2	IGHV1-69D	IGHV2-26	IGHV2-5	IGHV2-70	IGHV2-70D	IGHV3-11	IGHV3-13	IGHV3-15	IGHV3-16	IGHV3-19	IGHV3-20	IGHV3-21	IGHV3-22	IGHV3-23	IGHV3-25	IGHV3-29	IGHV3-30	IGHV3-30-2	IGHV3-32	IGHV3-33	IGHV3-33-2	IGHV3-35	IGHV3-36	IGHV3-37	IGHV3-38	IGHV3-41
MN pre-treatment	213	193699	53199	13.2191	904.996	15.7498	-0.0183	46.8219	0.594073	0	0.000407849	3.61385e-05	0.0182809	0.0424576	0.00360869	0.0667789	0.000480126	0.00686116	0.00181725	0.00250905	0.000283946	0.00207022	0.000304596	0.00913273	0.00654624	0.01603	4.64638e-05	0.00135778	0.0192722	0.00100155	0.00340735	0.000108416	0.000387199	0.00113062	0.00311308	0.000464638	0.0281158	0.00119257	1.03253e-05	0.0107073	0	5.16265e-06	0.00333507	0	0.000960253	2.06506e-05	0.000160042	0.000774397	0.000944765
MN pre-treatment	290	121793	44322	13.4919	1081.24	15.8506	-0.0156801	41.8242	0.635964	0	0.000599378	0.000180634	0.0333681	0.0194018	0.010641	0.106147	0.000270952	0.0122667	0.00348132	0.00219224	0.000837487	0.00298047	0.000541903	0.0319641	0.00269309	0.0215858	0.000410533	0.00217582	0.0305765	0.00201161	0.00357984	9.03172e-05	0.000205266	0.00264383	0.00321858	0.000238109	0.0264629	0.00050906	1.64213e-05	0.0123078	8.21065e-06	0	0.00490176	3.28426e-05	0.000747169	8.21065e-06	2.4632e-05	0.000344847	0.00137939
MN pre-treatment	302	188963	51537	12.6933	967.454	15.1454	-0.0475406	46.0637	0.631087	5.29204e-06	0.000264602	4.76284e-05	0.0209459	0.076253	0.00434477	0.0192048	0.000195806	0.00496393	0.00219091	0.00132301	0.000132301	0.000703841	0.000164053	0.0102348	0.00220678	0.00385261	0.000222266	0.00125421	0.0288152	0.00169345	0.00324931	0.000100549	0.000322815	0.0014659	0.00356154	0.000502744	0.0431196	0.00169345	1.58761e-05	0.00862603	2.11682e-05	0	0.0121188	2.11682e-05	0.00072501	5.29204e-06	3.17522e-05	0.00123305	0.00143414
MN pre-treatment	384	179969	49692	12.6772	581.96	15.2805	-0.0354705	46.286	0.621446	0	0.000416738	0.000150026	0.0362396	0.0639166	0.00672894	0.0372453	0.000172252	0.00870706	0.00396735	0.00071679	0.000344504	0.00131689	0.000500086	0.0167584	0.00296718	0.0155027	0.000133356	0.00603437	0.0312165	0.000877929	0.00389512	0.000100017	5.55651e-05	0.00188366	0.00321722	0.000261156	0.060277	0.000333391	2.22261e-05	0.00625108	5.55651e-06	1.1113e-05	0.00124466	1.1113e-05	0.000311165	2.77826e-05	5.55651e-05	0.00023893	0.000316721
MN pre-treatment	470	136981	32933	11.1625	185.95	15.756	-0.0318049	52.8606	0.598325	7.30028e-06	0.000204408	0.000211708	0.0210978	0.030413	0.00220469	0.0330849	0.000649725	0.00373044	0.00218278	0.00421956	0.000146006	0.00304422	0.000569422	0.0270621	0.00162796	0.00899395	2.19008e-05	0.00100744	0.0469189	0.00343113	0.00484009	5.84023e-05	2.92011e-05	0.00100744	0.00381075	0.000562122	0.0321869	0.000219008	2.92011e-05	0.022536	7.30028e-06	0	0.0112497	5.1102e-05	0.000963637	7.30028e-06	0	0.00118265	0.000890634
MN pre-treatment	471	54330	17885	10.1502	20.5629	15.2622	-0.0283203	56.9782	0.711279	1.8406e-05	0.0012332	7.36241e-05	0.0382109	0.0262838	0.00307381	0.00802503	0.000809866	0.00520891	0.000570587	0.0012148	0.000128842	0.00119639	0.000147248	0.013326	0.00368121	0.00618443	0.00180379	0.00596356	0.0177066	0.000662617	0.00638689	0	0.000110436	0.00173017	0.0104914	5.52181e-05	0.0371066	0.000607399	0	0.00552181	0	0	0.000773054	0	0.000128842	0	1.8406e-05	0.00132523	0.00018406
MN pre-treatment	497	85267	28090	12.7701	1841.02	15.1886	-0.0823784	56.7595	0.599187	2.34557e-05	0.000363564	0.000562938	0.0445893	0.0452227	0.0189405	0.0192806	0.00224002	0.00498434	0.00449177	0.00338935	0.000574665	0.00227521	0.000832679	0.0166067	0.00578184	0.0171931	8.20951e-05	0.0014308	0.030985	0.00179436	0.00505471	0.000363564	0.000574665	0.00750583	0.00417512	0.000527754	0.0435104	0.000985141	0.000105551	0.0137802	1.17279e-05	0	0.00394056	4.69115e-05	0.00233385	3.51836e-05	4.69115e-05	0.00202892	0.000574665
MN pre-treatment	502	178048	49425	13.0919	617.224	15.2004	-0.0633195	48.995	0.624707	1.12329e-05	0.00028644	0.00036507	0.039377	0.156857	0.00471783	0.0453866	0.000426851	0.00598153	0.00129179	0.00189275	0.000151645	0.00123001	0.000348221	0.0293236	0.0014322	0.0138277	0.000129179	0.00107836	0.0425616	0.00180288	0.00694756	0.000134795	0.000112329	0.00417303	0.00554345	0.000162877	0.0526712	0.000966032	0.00028644	0.00801469	0	0.000123562	0.0041955	6.73976e-05	0.00153891	1.12329e-05	6.73976e-05	0.000522331	0.00182535
MN pre-treatment	503	154935	45998	12.4059	575.246	15.6417	-0.0962644	50.6514	0.606645	3.22716e-05	0.000406622	0.000212993	0.0811308	0.0313744	0.00270436	0.0420499	0.0060477	0.00981057	0.000974602	0.00205893	0.00109723	0.000677704	0.000464711	0.0205506	0.00597025	0.0365379	0.000651886	0.0045632	0.0354342	0.0342724	0.00258173	0.000258173	3.87259e-05	0.0104754	0.00400813	0.00032917	0.0337819	0.00032917	4.51802e-05	0.0611482	0	2.58173e-05	0.0029948	5.80889e-05	0.0035176	1.29086e-05	0.000103269	0.00112951	0.00564108
MN pre-treatment	504	111400	41406	13.0213	740.914	15.0805	-0.0475974	40.5664	0.645243	0	0.000394973	0.00018851	0.018851	0.0771095	0.00406643	0.0388869	0.00166966	0.00459605	0.00190305	0.00171454	0.000278276	0.00024237	0.000359066	0.0144794	0.00552962	0.012289	0.000116697	0.00187612	0.028474	0.00121185	0.00771993	0.00010772	1.79533e-05	0.00163375	0.00314183	0.000233393	0.0555027	0.000754039	0	0.00535009	0	0	0.00288151	2.693e-05	0.00105925	8.97666e-06	2.693e-05	0.00029623	0.00061939
MN pre-treatment	505	64461	21079	12.1397	1174.99	15.568	-0.0837344	42.9364	0.645763	0	0.000403345	0.000356805	0.0189882	0.0311506	0.00733777	0.0403034	0.000139619	0.00946309	0.0015203	0.00529002	0.000372318	0.00133414	0.000558477	0.0167078	0.00454538	0.0295528	0.000605017	0.00331984	0.0291184	0.000853229	0.00670173	0.000139619	0.000341292	0.00322676	0.00193916	0.000527451	0.04277	0.000387831	3.10265e-05	0.0169715	0	0	0.00578644	0.000108593	0.00131863	4.65398e-05	0.00062053	0.000248212	0.00110144
MN pre-treatment	506	227605	57352	12.2636	631.159	15.8893	-0.0549537	51.8038	0.605287	8.78715e-06	0.000456932	4.39358e-06	0.0378375	0.0653896	0.00237253	0.0165682	0.000166956	0.00486808	0.00210452	0.00203862	7.46908e-05	0.000391028	0.00112915	0.0159443	0.00236814	0.00592254	2.19679e-05	0.00181015	0.0159399	0.000628281	0.00209574	0.00035588	1.31807e-05	0.00463083	0.00223194	0.000136201	0.0437073	0.00176622	1.31807e-05	0.0152281	0	0	0.00178819	3.0755e-05	0.000593133	4.39358e-06	4.39358e-06	0.00107203	0.000127414
MN pre-treatment	512	252726	57762	12.4084	567.797	15.2013	-0.0268788	47.3724	0.629523	0	0.000494607	7.51802e-05	0.0336451	0.0799759	0.00639428	0.0323869	0.000225541	0.00379067	0.0023385	0.0129508	0.000538132	0.00475218	0.00140468	0.0151468	0.0173706	0.0190918	0.000205756	0.00362448	0.0301354	0.00183598	0.00654464	0.00254426	3.95685e-05	0.00308239	0.00482736	0.000130576	0.0288573	0.000498564	0	0.0162508	0	0	0.000728061	1.18706e-05	0.000593528	7.91371e-06	2.7698e-05	0.00385793	9.10077e-05
MN pre-treatment	543	482672	95263	11.3984	147.07	14.6737	-0.103278	23.8611	0.70937	2.0718e-06	0.00179004	0.000178175	0.0122195	0.0473282	0.00300825	0.0595415	0.0030414	0.00194128	0.00119129	0.00524787	0.00018439	0.00119957	0.000868084	0.0054882	0.00245716	0.0266889	2.90052e-05	0.000886731	0.0618764	0.00486666	0.00648888	0.000319057	0.000138811	0.000397786	0.0139826	0.00175481	0.302651	0.00202001	2.0718e-06	0.0135454	4.1436e-06	0	0.00920501	6.2154e-06	0.00479829	2.0718e-05	2.0718e-06	0.000163672	0.00159943
MN pre-treatment	546	230142	54838	11.8124	517.72	13.9801	-0.0959944	42.8887	0.608907	4.34514e-06	0.000621356	0.000212912	0.0231857	0.0886627	0.000934206	0.0355389	0.00175109	0.00136438	0.000386718	0.0026375	0.001473	0.00059963	0.00059094	0.00421479	0.000204222	0.00302422	3.91063e-05	0.000960277	0.106182	0.00275917	0.0219126	0.00485787	0.000282434	0.015334	0.0269225	0.000391063	0.108098	0.00114712	4.34514e-06	0.0086338	8.69029e-06	0	0.0126053	1.73806e-05	0.0195271	8.69029e-06	9.55932e-05	0.000121664	0.000538798
MN pre-treatment	547	460996	132037	13.7861	2186.43	14.5184	-0.061526	31.4629	0.625124	0.000401305	0.00203256	5.85688e-05	0.0196705	0.0925648	0.00421479	0.0512477	0.00280914	0.00659442	0.00239481	0.00392194	0.000225598	0.0020152	0.00223863	0.0245859	0.000950117	0.00376793	3.25382e-05	0.000711503	0.0511154	0.00220609	0.0268766	0.00566165	0.000312367	0.00309547	0.0165294	0.00332758	0.111864	0.00151411	0	0.016998	2.38614e-05	0	0.0123363	1.08461e-05	0.00741655	0.000106292	2.38614e-05	0.000162691	0.000186553
MN pre-treatment	551	690194	106267	10.3548	65.3607	15.0559	0.41118	31.8889	0.662263	1.44887e-06	0.00035787	1.44887e-06	0.0841937	0.289621	0.000802673	0.00501888	0.00278762	0.00205015	0.000943213	0.00195018	0.0040974	0.00028108	0.000453496	0.0013489	0.000124603	9.99719e-05	6.37502e-05	3.47728e-05	0.0109824	0.00192989	0.131354	0.000541877	9.56253e-05	0.000446251	0.0158897	0.00038395	0.0806875	0.00283109	2.89774e-06	0.00751093	1.44887e-06	1.44887e-06	0.0017966	7.24434e-06	0.00120111	2.89774e-06	2.89774e-06	0.000246308	0.000298467
MN pre-treatment	558	71690	18851	10.3178	58.8899	15.5391	-0.126738	46.4571	0.633305	0	0.000613754	0.000181336	0.0608732	0.0606221	0.00460315	0.028679	0.000376622	0.00555168	0.000627703	0.00322221	0.00541219	0.000850886	0.000209234	0.0257498	0.00295718	0.0117869	1.39489e-05	0.000181336	0.031971	0.00309667	0.0134328	0.00026503	0.000153438	0.00433812	0.00767192	0.000181336	0.0511647	0.00821593	2.78979e-05	0.0136142	0	2.78979e-05	0.0162784	0.000111592	0.00186916	0	0	0.000488213	0.00171572
MN pre-treatment	567	3455711	787729	15.0959	3606.32	15.5678	-0.0424051	32.138	0.662498	1.44688e-06	0.000937868	0.000529558	0.0336938	0.137373	0.0114743	0.0691412	0.000234395	0.00296061	0.00251873	0.000359984	0.000168996	0.000739645	0.00127268	0.0143834	0.0037344	0.0109668	1.1575e-05	0.0002506	0.0466382	0.00258586	0.0157316	0.000199959	0.000310211	0.0045568	0.00806231	0.00219116	0.0655367	0.000623895	3.06739e-05	0.0171128	2.02563e-06	2.89376e-06	0.00497119	7.52378e-05	0.00565441	1.64944e-05	5.15089e-05	0.00197644	0.000828773
MN pre-treatment	579	4513122	926374	12.8533	47.9117	15.245	-0.0955921	44.0701	0.571289	4.43152e-07	0.00039219	9.4613e-05	0.02012	0.0284993	0.00210874	0.0257527	0.00487623	0.00129666	0.00189625	0.0246477	0.00014624	0.000842432	0.000547515	0.0055846	0.00205024	0.0102282	3.12422e-05	0.000488575	0.0489382	0.00284105	0.00788456	0.00073519	0.000401717	0.00369212	0.0097509	0.00184351	0.0868795	0.00287539	0.000360726	0.004876	2.43734e-06	5.09625e-06	0.00293034	6.78023e-05	0.000954993	4.45368e-05	1.66182e-05	0.000178147	0.00295051
MN pre-treatment	581	34545	12254	11.2301	352.19	15.8911	-0.0155283	32.564	0.657007	0	0.000926328	0.000144739	0.0707194	0.122594	0.00309741	0.0565639	0.000723694	0.00277898	0.00202634	0.00500796	0.000405268	0.00231582	0.000521059	0.0146765	0.00298162	0.0172818	2.89477e-05	0.000694746	0.0717615	0.0018816	0.0057606	0.000115791	0.000434216	0.00240266	0.0117817	0.000405268	0.0569113	0.000202634	5.78955e-05	0.0448401	0	0	0.0119844	2.89477e-05	0.00124475	0	0	0.00523954	0.000405268
MN pre-treatment	584	4965144	884463	13.2696	57.7857	15.5741	-0.0486445	28.3209	0.737609	1.20842e-06	0.00181828	0.00095828	0.0165256	0.163401	0.00978783	0.0571991	0.00106543	0.00144991	0.00473904	0.000442082	0.000157095	0.000324059	0.00252198	0.0221365	0.00156048	0.0162738	9.0229e-05	0.000275722	0.0509762	0.00277313	0.00784227	0.000105939	3.74611e-05	0.00101749	0.00502584	0.000244706	0.050807	0.000127287	1.00702e-06	0.0175693	4.02808e-07	0	0.000693837	9.06318e-06	0.00173731	1.08758e-05	1.61123e-05	0.00206882	0.000390925
MN pre-treatment	588	2478903	504503	13.7594	1433.08	15.3646	-0.047354	37.315	0.652037	1.21021e-06	0.000527249	0.000266247	0.0249082	0.0972959	0.00771632	0.048014	0.00019202	0.00484569	0.00400863	0.000233974	0.000439711	0.000494977	0.000895154	0.028202	0.00243454	0.018081	0.000544596	0.00283351	0.0656076	0.00342853	0.0272358	0.000153697	7.90672e-05	0.0152793	0.011702	0.000121021	0.0634551	0.00275001	1.97668e-05	0.0179047	5.2846e-05	1.00851e-05	0.00367622	5.93004e-05	0.00171568	2.78349e-05	1.896e-05	0.0010077	0.000100851
MN pre-treatment	594	481446	151340	14.2384	2180.68	14.9217	-0.0671753	31.2891	0.639243	4.36186e-05	0.00274174	0.000155781	0.0323629	0.117133	0.0149591	0.0454693	0.00235333	0.0108382	0.00279574	0.00263581	0.000438263	0.00304292	0.0072303	0.0206337	0.00394021	0.0148324	0.000294945	0.000546271	0.0657166	0.00274174	0.00806736	0.00245303	0.000396722	0.00284144	0.0156258	0.000639739	0.0715844	0.00104062	0	0.0155968	4.15415e-06	4.15415e-06	0.014095	6.23123e-06	0.0134553	3.53103e-05	1.24625e-05	0.00151419	0.000961686
MN pre-treatment	601	428711	126250	13.7062	2268.14	14.6895	-0.032942	31.4234	0.626523	4.66515e-06	0.00202701	0.000289239	0.0245643	0.12215	0.00815468	0.0371019	0.000809403	0.00248886	0.00376711	0.00677146	0.000874715	0.00175643	0.00201768	0.0131604	0.00255184	0.0046978	0.000158615	0.002048	0.0412632	0.00269646	0.0126052	0.000984346	0.000436191	0.0023559	0.00859087	0.00227193	0.101563	0.00248419	4.66515e-06	0.0273424	2.33257e-06	0	0.00969651	2.33257e-06	0.00460917	1.6328e-05	1.6328e-05	0.000996009	0.00138788
MN pre-treatment	613	134886	42897	12.6285	1147.47	14.2168	-0.105449	32.4719	0.639186	7.41367e-06	0.0037958	0.000274306	0.0148422	0.0996026	0.00435924	0.0353039	0.00440372	0.00346218	0.00253547	0.00234272	0.000511543	0.00108981	0.00149756	0.011076	0.00385511	0.0122029	4.4482e-05	0.00449268	0.055217	0.00458165	0.0243984	0.00088964	0.000452234	0.00269858	0.0225005	0.00248358	0.0856279	0.00416648	0	0.0127663	0	0	0.0106609	7.41367e-06	0.00555284	2.2241e-05	0	0.00117136	0.00232789
MN pre-treatment	614	3299284	782249	14.6682	1497.95	16.1509	-0.0155116	37.0266	0.650412	6.06192e-06	0.000974151	4.30396e-05	0.0339095	0.114677	0.0268446	0.0557551	0.0338398	0.00356926	0.00482529	0.00307248	0.000543754	0.0012533	0.00142243	0.0264854	0.00259511	0.0142943	0.000278545	0.00350076	0.0539305	0.0026824	0.00993397	8.12297e-05	4.54644e-05	0.00322706	0.00516536	0.00029764	0.0554208	0.000524053	9.69907e-06	0.0162614	2.12167e-06	3.09158e-05	0.0036126	8.78979e-06	0.000835333	1.63672e-05	2.72786e-06	0.00143486	0.000145486
MN pre-treatment	620	2846208	470242	12.2807	407.119	15.364	-0.036776	45.1718	0.639157	5.27017e-06	0.000417046	2.9513e-05	0.0305213	0.0683151	0.00474386	0.0507359	0.000674933	0.00527966	0.00345618	0.00656417	0.000139835	0.000798606	0.00105544	0.00784201	0.000965495	0.0186374	3.23237e-05	0.00315508	0.0565187	0.00488088	0.0113073	0.000162321	0.000939847	0.00420243	0.0153629	0.000493639	0.0648909	0.000511558	1.75672e-05	0.0385569	1.40538e-06	7.72958e-06	0.00864835	2.81076e-06	0.000484153	1.82699e-05	9.13496e-06	0.00500666	0.00402149
MN pre-treatment	621	168521	38069	11.0804	302.145	13.4136	-0.0291973	32.953	0.633649	5.93398e-06	0.0021659	0.000391643	0.045116	0.107898	0.0181224	0.0356988	0.00138262	0.000694275	0.013304	0.00350105	0.000284831	0.00449202	0.000290765	0.0105743	0.000599332	0.0167635	1.78019e-05	0.000842625	0.0697064	0.00662232	0.0194634	0.0024804	7.71417e-05	0.000379775	0.0211784	0.00011868	0.068668	0.000510322	0	0.0037028	0	0	0.00863987	5.93398e-06	0.00395203	4.15378e-05	5.93398e-06	0.000373841	0.000338237
MN pre-treatment	623	283766	79373	12.7938	620.072	14.2425	-0.0693549	34.9923	0.613051	0.000754142	0.000683662	0.000130389	0.0183391	0.0516482	0.00613181	0.031311	0.0212851	0.00484202	0.00203337	0.00102902	0.000475744	0.000514508	0.000493364	0.0122425	0.00466934	0.0049865	0.000281922	0.00185716	0.140394	0.00216728	0.0111324	0.000451076	0.000116293	0.00543758	0.0294961	0.000556797	0.168611	0.00285799	3.52403e-06	0.00694586	7.04806e-06	0	0.00837662	1.76202e-05	0.00488078	4.22884e-05	3.52403e-06	0.00223776	0.00111007
MN pre-treatment	628	170507	43346	11.7958	421.492	14.6455	-0.124545	29.3997	0.629557	0	0.00441038	0.000299108	0.00868586	0.0541737	0.0107327	0.0649827	0.00149554	0.000733108	0.00211722	0.00310838	0.00415819	0.00321981	0.000563027	0.00721378	0.00306732	0.00656865	0.000134892	0.00117884	0.137044	0.000997027	0.0122048	0.000715513	0.000158351	0.00103222	0.0234243	0.00221692	0.0723841	0.00137238	0	0.00754221	5.86486e-06	5.86486e-06	0.0119585	0	0.00701437	4.1054e-05	1.17297e-05	0.000199405	0.0012023
MN pre-treatment	630	3579195	818216	14.5654	1058.28	15.6354	-0.0297764	38.7393	0.634595	2.79392e-06	0.00146625	0.000353431	0.0573556	0.0680404	0.0190032	0.0637208	0.00128381	0.00811775	0.002317	0.00146569	0.000293083	0.000755757	0.00233768	0.018037	0.00419452	0.0250542	0.000530566	0.00109242	0.086705	0.00239858	0.0100514	0.000467424	0.00235416	0.00536378	0.012471	0.000571637	0.0750979	0.00077699	7.82299e-06	0.0154906	3.35271e-06	4.19089e-06	0.00333846	0.000289171	0.00270843	1.59254e-05	1.70429e-05	0.000897129	0.0040294
MN pre-treatment	633	206451	49382	11.6604	495.857	14.8741	-0.0155076	29.6138	0.610703	4.84376e-06	0.000968753	6.29689e-05	0.0175683	0.0768124	0.0177718	0.0344489	0.000712033	0.00595299	0.00857346	0.00149188	0.000188907	0.000760471	0.0238701	0.014725	0.00509564	0.0165172	1.93751e-05	0.000145313	0.0784545	0.00175344	0.0127875	0.000184063	2.90626e-05	0.00684908	0.00836034	0.00234438	0.105478	0.000968753	4.84376e-06	0.0209541	0	9.68753e-06	0.0211624	0	0.00330829	4.84376e-06	9.68753e-06	0.000343907	0.00665533
MN pre-treatment	634	5949114	1215345	14.7947	2386.34	15.822	-0.0175411	27.3375	0.677988	6.72369e-07	0.00120505	0.00133112	0.0278979	0.113893	0.0101862	0.0879817	0.000825165	0.0034237	0.00358121	0.00111781	0.000265418	0.00136188	0.00240574	0.0231877	0.00134743	0.0132309	0.000365433	0.00452135	0.0498399	0.00243683	0.00936593	0.00018507	4.79063e-05	0.0036197	0.00847151	0.00139315	0.0559964	0.000454353	7.05987e-06	0.0485573	1.68092e-06	3.02566e-06	0.00371551	1.05898e-05	0.00128742	2.28605e-05	3.86612e-06	0.00213763	0.000297859
MN pre-treatment	638	9891647	1302708	12.5244	198.385	17.3905	-0.145408	46.0662	0.601815	9.09859e-07	0.000218669	5.55014e-05	0.012416	0.0304859	0.00299718	0.0414794	0.000114036	0.00342572	0.00155353	0.020351	0.000153564	0.000619816	0.000867196	0.00960295	0.00167303	0.0116244	2.52738e-05	0.00199542	0.0651266	0.00118352	0.0132915	0.000537322	0.000128391	0.00302134	0.0101791	0.000382444	0.0559892	0.000333109	0.000970213	0.0392154	2.83067e-06	3.74053e-06	0.0038206	0.00432345	0.00144122	2.51728e-05	5.0851e-05	0.00251535	0.00037375
MN pre-treatment	639	263865	74046	12.6761	1021.6	15.0229	-0.0664571	26.9249	0.650352	3.78982e-06	0.00315313	6.82167e-05	0.0299585	0.129051	0.0127186	0.0532962	0.00519205	0.00341462	0.00687852	0.0071438	0.000272867	0.00303185	0.00061395	0.0140072	0.00284236	0.0136509	0.000109905	0.000295606	0.0769825	0.00500256	0.00858772	0.00251644	5.30574e-05	0.0103841	0.0205825	0.000375192	0.0796923	0.00347526	3.78982e-06	0.0248536	7.57963e-06	0	0.00905766	0.000765543	0.00242169	1.13695e-05	5.68473e-05	0.00195934	0.00082618
MN pre-treatment	641	2494797	544865	14.8453	2215.93	15.4336	-0.0609752	36.0922	0.659153	1.2025e-06	0.000944365	0.00013468	0.0242797	0.108043	0.00419914	0.0720199	0.000807681	0.00257937	0.00233646	0.00474067	0.000226872	0.00135923	0.000941159	0.0139651	0.00382236	0.0357584	0.000175565	0.00459276	0.0565717	0.00578364	0.00659332	0.000145102	0.000165545	0.00808002	0.0145779	0.000262947	0.0549568	0.00162218	1.08225e-05	0.0230901	3.60751e-06	2.40501e-06	0.00298662	2.44509e-05	0.00222343	1.24259e-05	4.28893e-05	0.00142577	6.65385e-05
MN pre-treatment	642	2651996	649161	15.5668	4936.75	15.7072	-0.0177085	29.0385	0.674086	2.63952e-06	0.000723606	0.000343138	0.0247666	0.159024	0.0110641	0.0620751	0.000515838	0.00437708	0.00401999	0.001227	0.000466818	0.00103695	0.00274774	0.0190864	0.00206109	0.0100777	9.04979e-06	5.31675e-05	0.0457783	0.00253281	0.0138616	0.000213801	0.000210785	0.00286388	0.00620476	0.0026086	0.0513862	0.00075528	6.03319e-06	0.0134782	3.0166e-06	2.63952e-06	0.00216554	1.58371e-05	0.00447663	1.62142e-05	6.03319e-06	0.0008043	0.000471343
MN pre-treatment	654	462136	86939	11.6436	378.708	14.675	-0.0548385	37.9372	0.58041	8.65546e-06	0.00154284	3.89496e-05	0.0714076	0.0843475	0.00251658	0.0930397	0.00126802	0.00786998	0.00352494	0.00495092	0.000659979	0.00295368	0.000428445	0.00745019	0.00698496	0.0124141	2.81302e-05	0.00151471	0.034914	0.00271998	0.0141798	0.000551786	0.000112521	0.00444242	0.0183474	0.000668634	0.0481503	0.0066409	4.32773e-06	0.0365477	2.16387e-06	2.16387e-06	0.0117173	2.16387e-06	0.00917912	8.65546e-06	4.32773e-06	0.000930462	0.00883073
MN pre-treatment	661	241593	47125	10.8258	314.115	14.4979	-0.113835	35.5872	0.621682	4.13919e-06	0.000753333	3.31135e-05	0.0339497	0.100301	0.00581971	0.0432918	0.00191231	0.00207374	0.000273187	0.00450344	9.93406e-05	0.00855985	9.93406e-05	0.00141974	0.0117015	0.00719392	4.13919e-06	0.000269048	0.0330928	0.00151908	0.057481	0.000149011	6.20879e-05	0.00856399	0.00594388	0.000223516	0.05662	0.00771546	1.65568e-05	0.013858	8.27839e-06	0	0.017604	0	0.0014363	1.24176e-05	0.00025663	0.00495875	0.000939597
MN pre-treatment	663	4363372	815439	14.0127	922.401	16.062	-0.0586172	46.9665	0.588666	1.37508e-06	0.000688	0.000203742	0.0374456	0.0431387	0.0128673	0.0760048	0.00337652	0.0161322	0.00305452	0.00628619	0.000110236	0.00257163	0.00225926	0.0368401	0.00200556	0.0130573	0.000325207	0.00179219	0.0588345	0.00325276	0.0240873	0.000209471	0.000393274	0.00300639	0.00751506	0.00424213	0.121696	0.00133177	1.16882e-05	0.0270153	1.60426e-06	1.48967e-05	0.00332358	0.000167073	0.00100358	9.85476e-06	9.62558e-05	0.00299608	0.00163406
MN pre-treatment	674	4594908	895541	13.993	416.715	15.7707	-0.0522291	43.9685	0.617528	4.13501e-06	0.000820256	5.17965e-05	0.311032	0.0462756	0.00232671	0.0307225	0.000909267	0.00151755	0.00139285	0.00156391	0.00476941	0.00283771	0.00103963	0.0292583	0.00267361	0.0122816	1.52343e-05	0.000681189	0.0405475	0.00164704	0.0772607	0.000558662	0.000164748	0.00378027	0.00830767	0.000423077	0.0706634	0.00138849	1.84987e-05	0.0209793	1.74106e-06	4.57028e-06	0.00561665	7.18186e-06	0.00238242	1.41461e-05	4.96201e-05	0.000925807	0.000743867
MN pre-treatment	676	3299398	710800	15.1762	3523.2	15.18	-0.0385446	31.8433	0.660968	2.42468e-06	0.000574347	0.000189125	0.0328184	0.133283	0.00864915	0.0521441	0.000241256	0.00567013	0.0036734	0.00304692	0.000280354	0.000836819	0.00127175	0.0236237	0.00422168	0.0134779	0.000153361	0.000366127	0.0787868	0.00545009	0.0115748	0.000365521	0.000425532	0.00411469	0.0104968	0.000482815	0.073718	0.00130327	5.15246e-06	0.0409284	1.21234e-06	1.51543e-06	0.0030845	3.81888e-05	0.00275778	1.09111e-05	5.15246e-06	0.00285416	0.000205795
MN pre-treatment	677	3665407	904293	16.0566	8637.89	15.424	-0.0478342	29.4253	0.683169	2.72821e-06	0.00129617	0.000198614	0.014651	0.0757095	0.0116505	0.0651808	0.000614393	0.00326321	0.00222731	0.00118923	0.00027855	0.000747257	0.00250122	0.021665	0.00312735	0.0187294	2.75549e-05	0.00108719	0.0881556	0.00440006	0.020311	0.00012577	0.000143777	0.00330823	0.00933593	0.000405412	0.0789432	0.000749985	1.22769e-05	0.0264988	1.3641e-06	0.000111311	0.00394499	8.15735e-05	0.00148415	1.20041e-05	0.000295192	0.00182681	0.000338844
MN pre-treatment	681	1080239	173008	10.278	33.4499	16.0064	-0.0558784	29.1697	0.651525	1.38858e-05	0.0021523	3.88803e-05	0.0503472	0.0404346	0.00193939	0.0310672	0.000461009	0.00298638	0.000611902	0.000784086	0.000517478	0.00265404	0.000233282	0.0138747	0.000961824	0.0091813	8.33149e-06	0.000191624	0.0242169	0.00125435	0.00653744	8.05377e-05	4.25832e-05	0.00231801	0.0139728	0.000189773	0.0340702	0.000184218	6.48005e-06	0.00550619	2.22173e-05	0	0.00126268	9.25721e-06	0.00167	1.57373e-05	9.25721e-05	0.000146264	0.000437866
MN pre-treatment	683	4031309	888789	15.2642	3044.07	16.012	-0.0400409	39.2245	0.651465	5.45728e-06	0.00394686	0.000161238	0.0269595	0.122433	0.00887578	0.0438456	0.000826034	0.0133773	0.00467119	0.00191104	0.00165529	0.0020636	0.00161684	0.0187989	0.00288145	0.016997	9.92234e-05	0.00201622	0.0589114	0.00596655	0.00942771	0.000353483	0.000260213	0.00522758	0.0110785	0.000301887	0.0550392	0.00112197	1.11626e-05	0.0310703	3.47282e-06	2.30694e-05	0.00310395	7.39214e-05	0.00244065	4.73792e-05	0.000282787	0.00244561	0.000380274
MN pre-treatment	694	4820137	959164	14.4206	1337.56	15.5095	-0.0392236	26.9247	0.66523	2.48956e-06	0.0010008	0.00023879	0.0405196	0.0713679	0.00523699	0.0592081	0.000261818	0.00526562	0.00276901	0.000233396	0.000493969	0.00157589	0.00114457	0.0235317	0.00398806	0.0243404	0.000101242	0.00110764	0.0872382	0.00287585	0.0149954	0.000204351	3.15344e-05	0.00380031	0.0111146	0.000653301	0.0976458	0.000206218	9.33583e-06	0.0347123	6.01643e-06	1.1203e-05	0.00277648	1.99164e-05	0.00240491	2.05388e-05	8.09106e-06	0.0019599	0.000333808
MN pre-treatment	696	2641209	497685	13.5455	370.242	17.0924	-0.0593635	50.5736	0.585355	2.6503e-05	0.00129335	0.000170377	0.0992591	0.100895	0.00484589	0.0519039	0.000256701	0.00475085	0.0086256	0.0156451	0.000357412	0.00249734	0.00452066	0.0141155	0.00146524	0.00878234	5.60349e-05	0.000705359	0.0456787	0.00206193	0.0100064	5.71708e-05	0.00138914	0.00231031	0.00806487	0.000244964	0.0518414	0.00229062	1.89307e-05	0.00427001	1.89307e-06	0.000126079	0.00790661	2.27169e-05	0.00151484	3.52111e-05	7.19368e-06	0.00453656	0.000858319
MN pre-treatment	697	2583315	574699	14.2987	1398.03	15.5676	-0.0243816	39.0588	0.62817	4.64519e-06	0.000871748	0.000138969	0.0836592	0.0836116	0.0110799	0.0534197	0.00318118	0.0107544	0.00309293	0.00190917	0.000924394	0.00134982	0.000816393	0.0555449	0.00413732	0.0228195	0.000298067	0.0055332	0.0726683	0.00324157	0.0151731	0.000178453	0.00011071	0.00405603	0.00563036	0.000511746	0.0724252	0.000506713	1.58711e-05	0.0450526	1.78066e-05	4.25809e-06	0.00806599	2.24518e-05	0.00232453	2.82583e-05	1.58711e-05	0.00133549	0.000820651
MN pre-treatment	702	344521	85469	12.6046	884.934	14.4889	-0.0572287	26.5831	0.643921	1.74155e-05	0.00271101	0.000171252	0.0162748	0.163111	0.00240914	0.0585625	0.00165447	0.00477475	0.00264425	0.00242365	0.000153837	0.00134099	0.00108266	0.0101126	0.00150354	0.00560779	6.38568e-05	0.00152966	0.0450103	0.00197085	0.0061912	0.000246719	0.000104493	0.00319284	0.0255862	0.000345407	0.0790402	0.000873677	5.80516e-06	0.00824043	5.80516e-06	0	0.0108005	2.90258e-06	0.0137524	5.80516e-05	8.70774e-06	0.000278648	0.00136712
MN pre-treatment	703	2737542	627514	14.5826	1009.95	15.625	-0.0545471	37.7471	0.651914	4.38349e-06	0.000543919	0.000178993	0.0428812	0.0941111	0.00452048	0.0605956	0.000715605	0.00494422	0.00244672	0.00363136	0.000399994	0.00130044	0.00219905	0.0169144	0.00329894	0.0107629	2.48398e-05	0.00107213	0.0494268	0.00294132	0.0135534	0.000130044	0.000159998	0.00371428	0.0126975	0.000829211	0.0816075	0.00105021	6.20995e-06	0.0199884	1.82646e-06	6.20995e-06	0.00340415	2.8858e-05	0.000985556	1.24199e-05	0.000287484	0.0022659	0.000875238
MN pre-treatment	709	110860	50148	13.7097	2376.88	15.0339	-0.0525102	35.4886	0.598303	1.80408e-05	0.00753202	0.000387877	0.0237597	0.0742107	0.0069457	0.039401	0.00297673	0.00503338	0.0075681	0.00775753	0.000441999	0.00157857	0.00122677	0.0117626	0.00718925	0.0127729	0.00147934	0.00110951	0.0211979	0.00291358	0.00893018	0.00220999	0.000820855	0.00149738	0.0147483	0.00143424	0.108533	0.00427566	3.60815e-05	0.0170305	2.70612e-05	0	0.00916471	1.80408e-05	0.0224066	7.21631e-05	1.80408e-05	0.00069457	0.00579109
MN pre-treatment	711	183371	49331	12.285	724.351	14.5525	-0.0638568	31.4124	0.644075	1.09069e-05	0.00367561	9.27082e-05	0.015804	0.115967	0.00686041	0.0581281	0.000485355	0.00238315	0.00754209	0.00289032	0.00536617	0.000850734	0.00422095	0.0107542	0.00286305	0.00553523	4.90808e-05	0.00213229	0.0471176	0.0054098	0.0133391	0.00209957	0.00019087	0.00301029	0.011594	0.000343566	0.078153	0.00648412	1.63603e-05	0.034542	0	0	0.00870912	1.09069e-05	0.00307028	3.27206e-05	1.63603e-05	0.00019087	0.0036647
MN pre-treatment	713	2730621	550683	13.2958	360.087	15.648	-0.0784876	50.2641	0.593314	3.29595e-06	0.000483407	2.89311e-05	0.0343614	0.0532278	0.0131494	0.0300562	0.00159195	0.0117314	0.0172935	0.00388117	7.28772e-05	0.0047513	0.00121584	0.00998198	0.000903091	0.0033432	5.09042e-05	0.000235478	0.0427698	0.00177725	0.0263343	0.000328497	4.57771e-05	0.00104299	0.00775574	0.000387824	0.0811339	0.000845595	2.92974e-05	0.0115959	9.15543e-06	2.92974e-06	0.00566062	6.73839e-05	0.00308282	4.61433e-05	2.96636e-05	0.000216068	0.00121584
MN pre-treatment	715	3993078	637907	12.6751	540.68	15.1534	-0.0273995	49.8356	0.637185	1.25217e-06	0.000200848	0.000177056	0.0298098	0.0860782	0.00333803	0.0420761	0.000905818	0.00584737	0.00347426	0.00171822	0.000131728	0.000630341	0.00207158	0.0127313	0.00461449	0.00407255	2.85494e-05	0.00230273	0.0940232	0.00483261	0.00631418	0.000340339	6.61144e-05	0.00912629	0.0108656	0.000283741	0.0541139	0.00174727	6.68657e-05	0.0347211	6.7617e-06	0.000126719	0.0117984	0.000523406	0.0028051	0.00037565	2.98016e-05	0.0107263	0.000586765
MN pre-treatment	717	309412	77150	12.3761	701.139	14.2724	-0.0542854	36.894	0.631789	1.93916e-05	0.00632813	0.000113118	0.0920068	0.0638211	0.00292167	0.0405026	0.00203935	0.00749809	0.00179372	0.00400437	0.000210076	0.00368764	0.000814448	0.0136873	0.00895893	0.0163859	0.00107623	0.00389448	0.0814286	0.00434695	0.0179566	0.00708764	8.72623e-05	0.00216217	0.0145017	0.00043308	0.0702461	0.00219772	1.61597e-05	0.0217025	9.69581e-06	6.46387e-06	0.0350665	9.69581e-06	0.00362946	0.000103422	6.46387e-06	0.000488022	0.00291197
MN pre-treatment	721	186367	52560	12.6481	998.944	14.5464	-0.0411848	31.5875	0.634785	2.1463e-05	0.00229654	9.65836e-05	0.0303863	0.115836	0.00543551	0.0454211	0.00184582	0.014171	0.00197996	0.01181	0.000295117	0.000563404	0.000928276	0.0195045	0.0178841	0.0127383	0.000273654	0.0023502	0.0363047	0.00589697	0.013468	0.013232	0.000209265	0.00560722	0.00666964	0.000939007	0.0771489	0.0019907	5.36576e-06	0.0136559	5.36576e-06	5.36576e-06	0.00851546	5.36576e-06	0.00815058	1.60973e-05	0	0.000799498	0.00693792
MN pre-treatment	722	4271397	1015958	15.9938	5188.57	15.5992	-0.0396891	25.4219	0.687998	2.80939e-06	0.000873485	0.000360304	0.0344328	0.151796	0.00864307	0.0568877	0.000297795	0.00440395	0.00460037	0.00118345	0.00036124	0.000663951	0.00180128	0.0340968	0.00384933	0.0128007	0.000446926	0.00173971	0.0559529	0.00346397	0.0112057	0.000228965	0.00028843	0.00275039	0.00905886	0.000420471	0.045487	0.00132018	7.25758e-06	0.0129728	1.17058e-06	1.91975e-05	0.00443906	0.000199232	0.00115208	1.87292e-05	8.66227e-06	0.00100904	0.000310203
MN pre-treatment	732	514040	146620	13.4669	1482.69	14.055	-0.0847279	36.0431	0.593223	3.89075e-06	0.00101549	0.000560268	0.0119174	0.0609135	0.00646253	0.0337075	0.0068341	0.00135398	0.00289472	0.00377403	0.000332659	0.000221773	0.00126255	0.00432651	0.00172749	0.00197455	2.52899e-05	0.000227609	0.0422788	0.00377403	0.0458914	0.000519415	0.000116722	0.00350556	0.0171757	0.00239281	0.0957591	0.00144152	7.7815e-06	0.0108941	9.72687e-06	0	0.0155396	1.16722e-05	0.00537896	3.89075e-05	5.25251e-05	0.00125477	0.00592561
MN pre-treatment	734	4562975	935637	14.8907	3358.93	15.9237	-0.0214111	28.4501	0.677123	2.84902e-06	0.000633797	0.000174448	0.0273175	0.131742	0.0163851	0.0576352	0.000589747	0.00376596	0.00512582	0.00238463	0.00150735	0.00298424	0.00320295	0.0423699	0.00342452	0.0207991	0.000193076	0.00412231	0.0627117	0.00355601	0.0118861	9.37985e-05	0.0002128	0.00618807	0.00894767	0.000481046	0.0463829	0.000734389	6.79381e-06	0.0234553	1.09578e-06	1.9724e-06	0.00193076	1.16152e-05	0.00146922	9.42368e-06	1.66558e-05	0.00107912	0.00146001
MN pre-treatment	737	136154	34438	11.8158	589.734	14.537	-0.0747964	29.9547	0.62902	7.34462e-06	0.00345197	0.000220339	0.0204621	0.112894	0.0123537	0.0534689	0.00155706	0.013661	0.0164079	0.00362824	0.000881355	0.000425988	0.00898248	0.0106424	0.00038192	0.00378983	0.000124859	0.000257062	0.0380378	0.00621355	0.0182734	0.000741807	0.000528813	0.00624293	0.00732994	0.00550847	0.0812683	0.000800564	1.46892e-05	0.0129633	7.34462e-06	0	0.0177887	0	0.00370169	1.46892e-05	1.46892e-05	0.000220339	0.00049209
MN pre-treatment	738	136156	36828	11.7311	649.855	14.692	-0.0825853	29.268	0.619416	2.93781e-05	0.000954787	0.000543494	0.0179206	0.12681	0.00473721	0.0392785	0.00551573	0.00119716	0.010319	0.0117145	0.000249714	0.00138811	0.000293781	0.00844619	0.00414231	0.00887218	1.4689e-05	0.000881342	0.0677238	0.00256324	0.012728	0.000844619	0.0021446	0.000668351	0.0139325	0.00112371	0.0953685	0.00144687	1.4689e-05	0.0172449	0	0	0.0136094	0	0.00646317	2.93781e-05	0	0.00022768	0.000433326
MN pre-treatment	741	3771981	774621	14.2668	2098.03	16.1409	-0.0429511	36.0663	0.659896	3.18135e-06	0.00119592	0.000130701	0.0273975	0.0799604	0.0121154	0.0572551	0.000372483	0.0100679	0.00558195	0.00111612	0.000395018	0.00902444	0.0031278	0.0207761	0.00131973	0.00677098	0.000266703	0.00151485	0.036296	0.00588338	0.0143317	0.000450426	5.93852e-05	0.00476567	0.00649818	0.000622485	0.0976166	0.00117524	3.18135e-06	0.0340209	1.59068e-06	2.65113e-06	0.00240537	1.00743e-05	0.00169036	1.13998e-05	1.21952e-05	0.0013192	0.000931871
MN pre-treatment	744	4345822	890991	14.8647	4653.39	15.7548	-0.0257776	24.3674	0.689406	5.52255e-06	0.000763262	0.000456761	0.0405205	0.157923	0.00846284	0.0706205	0.000491507	0.0031085	0.00283721	0.000750146	0.000306041	0.000747154	0.00244994	0.0279995	0.00300496	0.015904	6.74211e-05	0.0019299	0.0723527	0.00390306	0.0115872	0.00194002	0.000350221	0.00251391	0.0090289	0.000832984	0.0628661	0.000211698	5.98276e-06	0.0496652	6.90318e-07	1.15053e-06	0.00283514	4.57911e-05	0.00271295	8.05371e-06	1.63375e-05	0.00291498	0.000432369
MN pre-treatment	748	1941060	530985	15.3882	1418.64	15.0622	-0.0470099	33.3637	0.681546	2.06073e-06	0.00163313	0.000200921	0.0212976	0.140905	0.00840726	0.0592146	0.000349294	0.00696527	0.00469795	0.00135854	0.000345172	0.000873749	0.001595	0.0322097	0.00284844	0.0230101	0.000147857	0.00196594	0.0490433	0.00438832	0.0106699	0.000199891	0.000130341	0.00318434	0.0073702	0.000731559	0.0583398	0.00121583	1.75162e-05	0.0120836	8.7581e-06	3.09109e-06	0.0171978	2.73047e-05	0.00201024	1.33947e-05	0.000156615	0.000727953	0.000343627
MN pre-treatment	750	1604623	396340	14.261	1684.82	14.5665	-0.00689216	37.5418	0.646139	2.4928e-06	0.000565865	7.97695e-05	0.0232977	0.0803167	0.00603693	0.0538239	0.000315962	0.00756003	0.00540999	0.00126946	0.000237439	0.000583315	0.00155613	0.0241508	0.00305804	0.0242792	0.00018509	0.00182722	0.0738703	0.00869612	0.015408	0.000754071	0.000113422	0.00243484	0.00994813	0.000497313	0.0683126	0.000850044	3.48992e-05	0.0160598	6.85519e-06	4.98559e-06	0.0036239	0.000127756	0.00355286	1.558e-05	5.98271e-05	0.00139347	0.000914233
MN post-treatment	492(290-P)	345579	57890	11.7851	712.037	15.6656	-0.0637084	47.6213	0.639676	0	0.000949132	0.000141791	0.0397854	0.0213902	0.00327566	0.0540571	4.34054e-05	0.0044968	0.000517971	0.000833384	8.10234e-05	0.00166098	0.000107067	0.0131605	0.00360265	0.0788474	1.15748e-05	0.000124429	0.027357	0.000960707	0.0044968	0.000144685	3.47243e-05	0.00128769	0.00273454	0.000546908	0.026758	0.000633719	0	0.00754386	2.89369e-06	0	0.0021558	5.78739e-06	0.000711849	2.89369e-06	1.44685e-05	0.000457204	0.000355924
MN post-treatment	508(470-P)	29607	13473	12.4843	1808.32	15.7262	-0.0549381	42.4095	0.620497	0	0.000810619	0.000135103	0.0349242	0.0274259	0.00327625	0.0394164	0.000168879	0.00898436	0.00162124	0.00138481	0.000878171	0.00114838	0.00199277	0.0246901	0.00192522	0.0189482	0.000135103	0.00199277	0.0226636	0.00104705	0.00381666	3.37758e-05	3.37758e-05	0.00331003	0.00466106	0.000168879	0.0287094	0.000337758	0	0.0112811	0	0	0.00226298	0	0.000574189	0	0	0.0011146	0.000506637
MN post-treatment	510(471-P)	148150	56499	14.2201	4767.26	15.7514	-0.0520231	46.6961	0.611489	0	0.000526493	0.000560243	0.0314276	0.0690854	0.00681741	0.0217955	0.000317246	0.00520418	0.00282821	0.00327371	0.000195748	0.00163348	0.00141073	0.0131826	0.0037732	0.0138576	4.72494e-05	0.00179548	0.0392035	0.00203847	0.00481269	0.000357746	0.000337496	0.00253797	0.00656092	0.000431995	0.0297604	0.00153898	1.34998e-05	0.018353	0	0	0.00444144	6.74992e-06	0.00110024	6.74992e-05	0.000107999	0.00162673	0.00191698
MN post-treatment	529(497-P)	275027	62687	11.9234	91.9104	15.3712	0.0477799	50.1977	0.623515	0	0.000676297	7.99921e-05	0.0234522	0.0376872	0.0022616	0.00627211	0.000210888	0.00230523	0.000948998	0.00190527	8.36282e-05	0.000461773	0.00426867	0.00572307	0.00399961	0.00882822	0.00023634	0.000701749	0.0272373	0.00229796	0.00438866	0.000330877	7.63561e-05	0.00346511	0.00399597	0.00150531	0.033524	0.00106899	1.818e-05	0.00843554	0	0	0.00447229	2.1816e-05	0.00097445	3.63601e-06	3.63601e-05	0.00184709	0.00130533
MN post-treatment	532(302-P)	166523	60790	14.4426	5535.19	15.7596	-0.0669381	50.7526	0.592249	1.80155e-05	0.00141122	0.00016214	0.0352804	0.0644235	0.00703206	0.0155114	0.000840725	0.00741039	0.00374122	0.00296055	0.000780673	0.00142923	0.0024321	0.0129171	0.00543468	0.026681	0.000180155	0.00269032	0.0344217	0.00159738	0.00583103	0.000306264	0.000270233	0.00241408	0.0048702	0.000666575	0.0338212	0.00210782	3.60311e-05	0.0135417	0	0	0.00375924	0.000108093	0.00118902	0	7.20621e-05	0.000888766	0.00142323
MN post-treatment	545(213-P)	124512	36127	12.2564	321.809	15.2265	-0.084785	49.1432	0.609489	8.03135e-06	0.00100392	0.000192753	0.0367274	0.0446865	0.00356592	0.0298847	0.000144564	0.00359805	0.0010762	0.00251381	0.000160627	0.00047385	0.000184721	0.0130108	0.002048	0.00630461	8.03135e-05	0.000425662	0.0317158	0.00220862	0.00741294	0.000449756	2.40941e-05	0.00583076	0.00605564	0.000224878	0.0382212	0.000578258	4.81881e-05	0.0121273	0	0	0.00711578	8.83449e-05	0.000497944	3.21254e-05	8.03135e-06	0.00542116	0.00114045
MN post-treatment	548(502-P)	215279	45548	10.7487	90.6115	14.8766	0.0407364	60.5841	0.508492	1.39354e-05	6.03868e-05	4.64513e-06	0.0326274	0.0125883	0.00871892	0.0113295	0.000938317	0.00355353	0.000631738	0.00273134	5.10965e-05	0.00051561	0.00018116	0.00860279	0.00761802	0.115432	0.000204386	0.00528616	0.0108232	0.000998704	0.0214652	1.85805e-05	8.82576e-05	0.00131922	0.00395301	0.000445933	0.0168107	0.000222966	2.32257e-05	0.0107349	0	4.64513e-06	0.00311689	6.50319e-05	0.000789673	4.64513e-06	9.29027e-06	0.00168618	0.000919737
MN post-treatment	549(505-P)	315359	66996	13.098	1660.33	15.7776	-0.0572882	40.498	0.625154	3.17099e-06	0.000932271	0.000123669	0.0329941	0.0320048	0.00377348	0.0446285	0.000114156	0.00957956	0.00168062	0.00137938	0.000824457	0.000859338	0.00218798	0.0257326	0.00131596	0.0167904	0.000145866	0.00178527	0.0259577	0.00119546	0.00455037	8.24457e-05	5.70778e-05	0.00335808	0.00544142	0.000212456	0.0308918	0.000371006	6.34198e-06	0.0131501	0	0	0.00196284	3.17099e-06	0.000523213	1.2684e-05	0	0.000903732	0.000399545
MN post-treatment	550(506-P)	5586	2501	10.2217	398.074	15.6117	-0.04845	44.9209	0.65355	0	0.000716076	0	0.028643	0.075188	0.00680272	0.0230934	0.000179019	0.0116362	0.0037594	0.00143215	0.000537057	0.0028643	0.00125313	0.0168278	0.00859291	0.0161117	0	0.0037594	0.0617615	0.00196921	0.00340136	0.000716076	0	0.000537057	0.0102041	0.000179019	0.0764411	0.000358038	0	0.00877193	0	0	0.0028643	0	0.00107411	0	0	0.00214823	0.00107411
MN post-treatment	552(384-P)	209940	61420	13.0084	995.11	15.415	-0.102393	52.2371	0.616047	0	0.000657331	8.57388e-05	0.0509908	0.0436506	0.00355816	0.0176717	0.000300086	0.00390111	0.00271506	0.00129561	0.000119082	0.00200533	0.000690674	0.0129561	0.00354387	0.0163094	1.42898e-05	0.000400114	0.0428789	0.0023864	0.00421073	0.000147661	0.000109555	0.00172907	0.00560636	0.000719253	0.0284367	0.000547776	3.81061e-05	0.00470611	0.000157188	1.90531e-05	0.00277222	2.85796e-05	0.00226731	0.000338192	9.52653e-06	0.000342955	0.000419167
MN post-treatment	553(503-P)	203108	61878	12.9884	287.289	16.5315	0.0126572	53.4209	0.588954	0	0.000443114	2.95409e-05	0.0141304	0.0510073	0.019881	0.0113782	0.000182169	0.00433759	0.000891152	0.0022648	0.000221557	0.000477578	0.000418497	0.0123235	0.00204817	0.0106495	7.87758e-05	0.000654824	0.0243417	0.00126534	0.00582941	0.000172322	0.000142781	0.00225988	0.00279654	0.000984698	0.0187093	0.00083207	2.46174e-05	0.00554877	4.92349e-05	4.92349e-05	0.00392402	0.00201371	0.000989621	4.92349e-06	0.000108317	0.000285562	0.000807452
MN post-treatment	554(504-P)	322834	61598	11.7737	297.661	15.3567	-0.018017	47.6318	0.577869	0	0.000514196	3.40732e-05	0.0228848	0.0186659	0.0012669	0.024954	4.95611e-05	0.001651	0.000591635	0.00112442	0.00126071	0.00402374	0.000167269	0.00804748	0.000582343	0.00290552	3.09757e-06	0.000430562	0.00947546	0.000864221	0.00303562	1.23903e-05	3.71708e-05	0.000545172	0.000981929	0.000117708	0.0201249	0.000439855	3.09757e-06	0.00442023	3.09757e-06	0	0.00180588	4.02684e-05	0.000408879	6.19513e-06	0	0.000105317	0.000238513
MN post-treatment	562(512-P)	214968	52800	12.0121	651.711	15.2484	-0.0438363	53.4709	0.60609	0	0.000841986	0.000158163	0.044402	0.0548314	0.00889435	0.00668006	0.000339585	0.00372148	0.00189331	0.00365636	0.000362845	0.000232593	0.00143742	0.00625209	0.00407037	0.00710338	6.97778e-05	0.00214916	0.0300929	0.003875	0.0087827	0.000102341	0.00110249	0.00266086	0.00823844	0.000120948	0.0346424	0.000544267	3.2563e-05	0.00611254	0	4.65186e-06	0.0027539	6.04741e-05	0.00271203	1.86074e-05	5.58223e-05	0.000641956	0.00139556
Health	N1	114552	57636	14.2532	2299.32	14.1281	-0.101997	39.7401	0.596593	0.000322997	0.00293317	0.000218241	0.0338885	0.0977984	0.00526398	0.032614	0.023605	0.0107986	0.00483623	0.00380613	0.000803129	0.00151896	0.00261017	0.00872966	0.00621552	0.014919	0.000872966	0.00239193	0.0369701	0.00308157	0.0431507	0.00206893	0.000584887	0.00219987	0.0121168	0.00144039	0.0641543	0.0037974	1.74593e-05	0.0174069	2.6189e-05	8.72966e-06	0.0161411	6.98373e-05	0.0043561	0.000113486	0.000296808	0.00201655	0.0015015
Health	N12	47875	17238	11.3772	4676.35	13.5783	-0.0915606	31.8509	0.600172	2.08877e-05	0.00154569	0.000104439	0.0250653	0.0737128	0.00198433	0.0480627	0.00394778	0.00225587	0.00534726	0.00217232	0.000334204	0.000501305	0.000334204	0.021577	0.0047624	0.00175457	0.000167102	0.000167102	0.117598	0.00712272	0.014705	0.00547258	0.00536815	0.00490862	0.0169399	0.00733159	0.110245	0.0015248	2.08877e-05	0.0171279	0	0	0.00469974	4.17755e-05	0.0262977	2.08877e-05	2.08877e-05	0.0222454	0.00018799
Health	N3	17464	12910	13.1983	1125.27	14.1703	-0.0579702	29.1716	0.650964	0.000229043	0.00395098	0.00578333	0.0310353	0.112345	0.00492442	0.0422011	0.00383646	0.00795923	0.00589785	0.00647045	0.00166056	0.00177508	0.00229043	0.0167774	0.00309208	0.00595511	0.000229043	0.00223317	0.0414567	0.00543976	0.0115667	0.00103069	0.000171782	0.00452359	0.0198694	0.00269125	0.0510192	0.00240495	0	0.0267407	0	0	0.0135135	0	0.00480989	0	5.72607e-05	0.00103069	0.00166056
Health	N5	33262	16115	12.3793	459.14	14.4409	-0.0396168	29.5228	0.62296	0	0.00363778	0.00120257	0.0300343	0.143317	0.00748602	0.073387	0.00601287	0.0134087	0.00679454	0.00604293	0.000571222	0.00174373	0.0026156	0.0211352	0.00195418	0.0171367	0.0013529	0.00264566	0.0494258	0.00450965	0.00974085	0.000541158	0.000390836	0.0021947	0.0153328	0.00228489	0.0833383	0.000631351	0	0.00309663	0	0	0.0237809	0	0.00694486	6.01287e-05	0.000420901	0.000541158	0.00159341
Health	N569	189454	73659	13.6112	1530.26	14.8908	-0.0119151	30.593	0.627984	0.000274473	0.00351537	9.50099e-05	0.0310207	0.157442	0.00533639	0.0444963	0.00147793	0.00398514	0.00244387	0.00804417	0.00164684	0.000797027	0.00116123	0.00855617	0.0022169	0.00619148	0.000364205	0.00242275	0.0263969	0.00361565	0.0539603	0.00164684	0.000110845	0.00181047	0.00677209	0.00164684	0.119237	0.00136709	5.27833e-06	0.014204	2.11133e-05	5.27833e-06	0.00521499	0	0.00481911	4.75049e-05	0.000105567	0.00119818	0.000849811
Health	N586	20010	8514	10.6842	144.539	15.6134	-0.0555936	23.7486	0.668304	0	0.0045977	0.00029985	0.0242379	0.172214	0.00874563	0.070015	0.0029985	0.00409795	0.0023988	0.00249875	0.00289855	0.0005997	0.00154923	0.0147926	0.0009995	0.0035982	4.9975e-05	0.000249875	0.0933533	0.00489755	0.0105947	0.0003998	0.000149925	0.003998	0.0087956	0.000449775	0.0998001	0.0175912	0	0.0069965	0	4.9975e-05	0.0065967	0	0.00489755	4.9975e-05	0	0.000249875	0.0001999
Health	N620	63635	29413	12.9455	1596.5	14.3352	-0.102669	31.9882	0.635447	0	0.00363008	0.000267149	0.0150703	0.0706687	0.00823446	0.0633142	0.0102931	0.00207433	0.00363008	0.00334721	0.00061287	0.00102145	0.000864304	0.0087059	0.00320578	0.0107174	0.000424295	0.00231005	0.0492182	0.0157775	0.0222362	0.000974307	0.000298578	0.00152432	0.0196904	0.00165004	0.0885205	0.00061287	6.28585e-05	0.0350908	4.71439e-05	3.14292e-05	0.0158403	7.85731e-05	0.00334721	0.000110002	6.28585e-05	0.000864304	0.0011786
Health	N631	45151	27382	13.9082	5146.8	14.7858	-0.0534035	35.7983	0.613099	0	0.00597993	0.000132887	0.0331333	0.0931541	0.00440743	0.0375185	0.00230338	0.00451817	0.00434099	0.00775177	0.00139532	0.00108525	0.00148391	0.00823902	0.00558127	0.00854909	0.00126243	0.00194902	0.0381387	0.00442958	0.0109854	0.00252486	0.000465106	0.00294567	0.0128236	0.00294567	0.112888	0.00281278	0	0.0190693	0.000155035	0	0.0112954	0.00011074	0.00354366	0.00011074	2.21479e-05	0.00121813	0.00137317
Health	N644	59153	21837	12.0374	903.25	14.4882	-0.0550098	28.4345	0.650765	0.000321201	0.00280628	0.000152148	0.0171589	0.0855747	0.00710023	0.0276402	0.00104813	0.00622116	0.00830051	0.00197792	0.000591686	0.00103122	0.000777644	0.0263385	0.00644092	0.0138962	1.69053e-05	0.00395584	0.093013	0.00613663	0.0198468	0.000676213	0.00135243	0.00309367	0.00919649	0.000997413	0.134955	0.000997413	1.69053e-05	0.0117999	1.69053e-05	0	0.0123916	0	0.00356702	8.45266e-05	1.69053e-05	0.00025358	0.00554494
Health	N646	45254	24686	13.0875	1190.37	14.6708	-0.0247291	37.7751	0.597528	0	0.00304945	4.4195e-05	0.0149379	0.0601052	0.00411013	0.027887	0.00607681	0.00788881	0.00291687	0.00399965	0.000729217	0.00119326	0.00070712	0.0107394	0.00746895	0.00989968	0.00212136	0.00698281	0.0547355	0.00296106	0.00574535	0.00165731	0.00044195	0.00678393	0.0124409	0.000574535	0.171985	0.00236443	2.20975e-05	0.00775622	0	0	0.0096566	0.000110487	0.00598842	8.839e-05	0	0.00026517	0.00167941
Health	N649	55124	27733	12.8071	583.668	14.0847	-0.0612687	37.1819	0.626545	0	0.00698425	0.000235832	0.0149844	0.054586	0.00223133	0.05484	0.00379145	0.00379145	0.00112474	0.00894347	0.0011066	0.000761919	0.000344677	0.00575067	0.00108846	0.00219505	0.00019955	0.00019955	0.053044	0.00426312	0.031021	0.000888905	0.00259415	0.00312024	0.0550395	0.000507946	0.130052	0.00217691	7.25637e-05	0.0267216	0	0	0.0158189	1.81409e-05	0.00402728	0.000344677	0	0.000634932	0.00234018
[truncated: 88 more columns]

## Sheet: S3
Table S3：Primer of the IGH constant region
Primer name	Sequence (5’ to 3’)
IgA	AGACCTTGGGGCTGGTCGGGGAT
IgM	GAATTCTCACAGGAGACGAGG
IgG	AAGACCGATGGGCCCTTGGTGGA
IgD	TGTCTGCACCCTGATATGATGG
IgE	TTGCAGCAGCGGGTCAAGG
